# Supplementary material
Source: HighWire-hosted journal article supplement (https://bjgpopen.org/highwire/filestream/6148/field_highwire_adjunct_files/0/AZ_10.3399BJGPO.2023.0015_v3.pdf)
Supplement: AZ_10.3399BJGPO.2023.0015_v3.pdf [file AZ_10.3399BJGPO.2023.0015_v3.pdf]

## **SUPPLEMENTARY MATERIALS**

### **Study design and population**

This was a retrospective, longitudinal, open-cohort study. Patients aged  $\geq 12$  years with a new asthma diagnosis or prevalent disease within 3 years of the index date and with evidence of short-acting  $\beta_2$ -agonist (SABA) inhaler prescription and both baseline (12 months prior to the index date) and follow-up data were included in the Clinical Practice Research Datalink (CPRD), with hospital admission and outpatient consultation records for asthma from the Hospital Episode Statistics (HES) database. The CPRD is a primary care database of anonymised medical records from over 40 million patients visiting general practitioners in the UK,<sup>22</sup> and HES database records are from visits to National Health Service (NHS) hospitals. Patients were identified using asthma Read codes. The index date was defined as the latest date of any of the following: 13<sup>th</sup> birthday, start of study period (1 January 2008), 1 year after the general practitioner practice began recording up-to-standard or research-quality data (CPRD quality control), 1 year after their continuous CPRD practice registration date or 1 year after first asthma Read code. The follow-up period ended at the earliest date of death, transfer out of CPRD, last date of CPRD data collection or end of study period (31 December 2019). Patients were excluded if they had less than 12 months of research-acceptable data, no current asthma, were at the highest 2016 Scottish Intercollegiate Guidelines Network/British Thoracic Society guidelines treatment step (continuous or frequent oral corticosteroid [OCS] use) and/or receiving non-asthma treatments including long-acting muscarinic antagonists/long-acting  $\beta_2$ -agonists without inhaled corticosteroids (ICS) or regular OCS without ICS.

**Supplementary Table 1: Unit costs by service based on NHS estimates**

| <b>Healthcare Resource Utilisation</b> | <b>Unit Cost</b> | <b>Notes</b>                                                                               |
|----------------------------------------|------------------|--------------------------------------------------------------------------------------------|
| Exacerbation – hospitalisation         | £813             | Weighted average of HRG codes DZ15M–R                                                      |
| Exacerbation – A&E                     | £263             | Weighted average of Type 01 A&E attendances, excluding dental care                         |
| Exacerbation – primary care with OCS   | £39.73           | Primary care (£38.25)+prednisolone (£1.48)                                                 |
| Primary care consultation without OCS* | £38              | Up 3.4% from last year                                                                     |
| Outpatient consultation*               | £157             | Using national schedule of NHS costs, outpatient attendance respiratory medicine unit cost |

\*Non–exacerbation-related HCRU

A&E, accident and emergency; HCRU, healthcare resource utilisation; HRG, Healthcare Resource Group; NHS, National Health Service; OCS, oral corticosteroids.

**Supplementary Table 2:** Annual non-exacerbation-related HCRU rates and events in UK patients with asthma by SABA inhaler use and BTS treatment steps

| Treatment                                   | SABA group | Patients | Overall non-exacerbation-related HCRU |        | Primary care visits without OCS prescription* |        | Outpatient visits* |        |
|---------------------------------------------|------------|----------|---------------------------------------|--------|-----------------------------------------------|--------|--------------------|--------|
|                                             |            |          | Rate                                  | Events | Rate                                          | Events | Rate               | Events |
| <b>No ICS</b>                               | Overall    | 37,118   | 0.530                                 | 19,673 | 0.491                                         | 18,225 | 0.039              | 1,448  |
|                                             | SABA 1-2   | 26,736   | 0.479                                 | 12,807 | 0.448                                         | 11,978 | 0.031              | 829    |
|                                             | SABA ≥3    | 10,382   | 0.662                                 | 6,873  | 0.607                                         | 6,302  | 0.054              | 561    |
| <b>Low-dose ICS</b>                         | Overall    | 69,684   | 0.656                                 | 45,713 | 0.626                                         | 43,622 | 0.029              | 2,021  |
|                                             | SABA 1-2   | 37,673   | 0.592                                 | 22,302 | 0.568                                         | 21,398 | 0.024              | 904    |
|                                             | SABA ≥3    | 32,011   | 0.727                                 | 23,272 | 0.692                                         | 22,152 | 0.035              | 1,120  |
| <b>Low-dose ICS+LABA</b>                    | Overall    | 28,400   | 0.916                                 | 26,014 | 0.831                                         | 23,600 | 0.085              | 2,414  |
|                                             | SABA 1-2   | 10,861   | 0.828                                 | 8,993  | 0.753                                         | 8,178  | 0.075              | 815    |
|                                             | SABA ≥3    | 17,539   | 0.974                                 | 17,083 | 0.881                                         | 15,452 | 0.093              | 1,631  |
| <b>Medium-dose ICS±additional therapies</b> | Overall    | 36,890   | 0.999                                 | 36,853 | 0.809                                         | 29,844 | 0.190              | 7,009  |
|                                             | SABA 1-2   | 13,049   | 0.856                                 | 11,170 | 0.731                                         | 9,539  | 0.125              | 1,631  |
|                                             | SABA ≥3    | 23,841   | 1.079                                 | 25,724 | 0.852                                         | 20,313 | 0.226              | 5,388  |
| <b>High-dose ICS±additional therapies</b>   | Overall    | 13,969   | 1.154                                 | 16,120 | 0.818                                         | 11,427 | 0.336              | 4,694  |
|                                             | SABA 1-2   | 3,198    | 0.983                                 | 3,144  | 0.757                                         | 2,421  | 0.226              | 723    |
|                                             | SABA ≥3    | 10,771   | 1.211                                 | 13,044 | 0.839                                         | 9,037  | 0.373              | 4,018  |

\*Non-exacerbation-related HCRU

BTS, British Thoracic Society; HCRU, healthcare resource utilisation; ICS, inhaled corticosteroid; LABA, long-acting  $\beta_2$ -agonist; OCS, oral corticosteroids; SABA, short-acting  $\beta_2$ -agonist.

**Supplementary Table 3:** Annual exacerbation-related HCRU rates and events in UK patients with asthma by SABA inhaler use and BTS treatment steps

| Treatment                                   | SABA group | Patients | Overall exacerbation-related HCRU |        | Primary care visits with OCS prescription |        | A&E   |        | Hospitalisations |        |
|---------------------------------------------|------------|----------|-----------------------------------|--------|-------------------------------------------|--------|-------|--------|------------------|--------|
|                                             |            |          | Rate                              | Events | Rate                                      | Events | Rate  | Events | Rate             | Events |
| <b>No ICS</b>                               | Overall    | 37,118   | 0.147                             | 5,456  | 0.140                                     | 5,197  | 0.003 | 111    | 0.004            | 148    |
|                                             | SABA 1-2   | 26,736   | 0.116                             | 3,101  | 0.111                                     | 2,968  | 0.002 | 53     | 0.003            | 80     |
|                                             | SABA ≥3    | 10,382   | 0.217                             | 2,253  | 0.208                                     | 2,159  | 0.004 | 42     | 0.006            | 62     |
| <b>Low-dose ICS</b>                         | Overall    | 69,684   | 0.158                             | 11,010 | 0.151                                     | 10,522 | 0.003 | 209    | 0.004            | 279    |
|                                             | SABA 1-2   | 37,673   | 0.119                             | 4,483  | 0.114                                     | 4,295  | 0.002 | 75     | 0.003            | 113    |
|                                             | SABA ≥3    | 32,011   | 0.199                             | 6,370  | 0.189                                     | 6,050  | 0.004 | 128    | 0.006            | 192    |
| <b>Low-dose ICS+LABA</b>                    | Overall    | 28,400   | 0.314                             | 8,918  | 0.298                                     | 8,463  | 0.006 | 170    | 0.010            | 284    |
|                                             | SABA 1-2   | 10,861   | 0.221                             | 2,400  | 0.213                                     | 2,313  | 0.003 | 33     | 0.006            | 65     |
|                                             | SABA ≥3    | 17,539   | 0.368                             | 6,454  | 0.348                                     | 6,104  | 0.007 | 123    | 0.013            | 228    |
| <b>Medium-dose ICS±additional therapies</b> | Overall    | 36,890   | 0.510                             | 18,814 | 0.486                                     | 17,929 | 0.007 | 258    | 0.016            | 590    |
|                                             | SABA 1-2   | 13,049   | 0.305                             | 3,980  | 0.294                                     | 3,836  | 0.005 | 65     | 0.007            | 91     |
|                                             | SABA ≥3    | 23,841   | 0.616                             | 14,686 | 0.586                                     | 13,971 | 0.008 | 191    | 0.020            | 477    |
| <b>High-dose ICS±additional therapies</b>   | Overall    | 13,969   | 0.705                             | 9,848  | 0.671                                     | 9,373  | 0.009 | 126    | 0.025            | 349    |
|                                             | SABA 1-2   | 3,198    | 0.433                             | 1,385  | 0.414                                     | 1,324  | 0.005 | 16     | 0.013            | 42     |
|                                             | SABA ≥3    | 10,771   | 0.796                             | 8,574  | 0.757                                     | 8,154  | 0.010 | 108    | 0.029            | 312    |

A&E, accident and emergency; BTS, British Thoracic Society; HCRU, healthcare resource utilisation; ICS, inhaled corticosteroid;

LABA, long-acting  $\beta_2$ -agonist; OCS, oral corticosteroids; SABA, short-acting  $\beta_2$ -agonist.

**Supplementary Table 4:** Extrapolation of HCRU costs to the broader UK asthma population by SABA inhaler use and BTS treatment steps

| Treatment                                    | SABA 1-2/year     |                          |                                 |                    | SABA ≥3/year     |                                 |                     |
|----------------------------------------------|-------------------|--------------------------|---------------------------------|--------------------|------------------|---------------------------------|---------------------|
|                                              | % Patients (CPRD) | UK Patients              | Cost per 1,000 Patients* (CPRD) | UK Population Cost | UK Patients      | Cost per 1,000 Patients* (CPRD) | UK Population Cost  |
| No ICS                                       | 20%               | 643,827                  | £26,746                         | £17,219,483        | 250,008          | £45,448                         | £11,362,483         |
| Low-dose ICS                                 | 37%               | 907,200                  | £27,324                         | £24,788,084        | 770,854          | £44,795                         | £34,530,190         |
| Low-dose ICS+LABA                            | 15%               | 261,543                  | £44,642                         | £11,675,731        | 422,355          | £69,691                         | £29,434,217         |
| Medium-dose ICS±additional therapies         | 20%               | 314,232                  | £60,140                         | £18,897,834        | 574,113          | £106,402                        | £61,087,045         |
| High-dose ICS±additional therapies           | 8%                | 77,011                   | £121,429                        | £9,351,367         | 259,375          | £208,457                        | £54,068,743         |
| <b>TOTAL</b>                                 |                   | <b>2,203,813</b>         |                                 | <b>£81,932,499</b> | <b>2,276,705</b> |                                 | <b>£190,482,678</b> |
| <b>HCRU cost difference, high versus low</b> |                   | <b>£108,550,179/year</b> |                                 |                    |                  |                                 |                     |

\*Expressed as an average (i.e., sum of costs per 1,000 patients per year). QOF database estimate of 4,480,518 used for all calculations. This does not exclude patients <12 years of age.

BTS, British Thoracic Society; CPRD, Clinical Practice Research Datalink; HCRU, healthcare resource utilisation; ICS, inhaled corticosteroid; LABA, long-acting  $\beta_2$ -agonist; SABA, short-acting  $\beta_2$ -agonist; UK, United Kingdom.

**Supplementary Table 5:** Extrapolation of HCRU costs to average asthma IC population (N=85,429) by SABA inhaler use and BTS treatment steps

| Treatment                                    | SABA 1-2/year     |                        |                                 |                    | SABA ≥3/year  |                                 |                    |
|----------------------------------------------|-------------------|------------------------|---------------------------------|--------------------|---------------|---------------------------------|--------------------|
|                                              | % Patients (CPRD) | IC Patients            | Cost per 1,000 Patients* (CPRD) | IC Population Cost | IC Patients   | Cost per 1,000 Patients* (CPRD) | IC Population Cost |
| No ICS                                       | 20%               | 12,276                 | £26,746                         | £328,320           | 4,767         | £45,448                         | £216,646           |
| Low-dose ICS                                 | 37%               | 17,297                 | £27,324                         | £472,629           | 14,698        | £44,795                         | £658,379           |
| Low-dose ICS+LABA                            | 15%               | 4,987                  | £44,642                         | £222,618           | 8,053         | £69,691                         | £561,215           |
| Medium-dose ICS±additional therapies         | 20%               | 5,991                  | £60,140                         | £360,321           | 10,946        | £106,402                        | £1,164,733         |
| High-dose ICS±additional therapies           | 8%                | 1,468                  | £121,429                        | £178,300           | 4,945         | £208,457                        | £1,030,916         |
| <b>TOTAL</b>                                 |                   | <b>42,020</b>          |                                 | <b>£1,562,188</b>  | <b>43,409</b> |                                 | <b>£3,631,889</b>  |
| <b>HCRU cost difference, high versus low</b> |                   | <b>£2,069,701/year</b> |                                 |                    |               |                                 |                    |

\*Expressed as an average (i.e., sum of costs per 1,000 patients per year). Percentages may not sum to 100% due to rounding.

BTS, British Thoracic Society; CPRD, Clinical Practice Research Datalink; HCRU, healthcare resource utilisation; IC, integrated care system; ICS, inhaled corticosteroid; LABA, long-acting  $\beta_2$ -agonist; SABA, short-acting  $\beta_2$ -agonist.

**Supplementary Table 6:** Extrapolation of HCRU costs to average PCN asthma population (N=50,000) by SABA inhaler use and BTS treatment steps

| Treatment                                    | % Patients (CPRD) | SABA 1-2/year |                                 |                        | SABA ≥3/year  |                                 |                     |
|----------------------------------------------|-------------------|---------------|---------------------------------|------------------------|---------------|---------------------------------|---------------------|
|                                              |                   | PCN Patients  | Cost per 1,000 Patients* (CPRD) | PCN Population Cost    | PCN Patients  | Cost per 1,000 Patients* (CPRD) | PCN Population Cost |
| No ICS                                       | 20%               | 7,185         | £26,746                         | £192,160               | 2,790         | £45,448                         | £126,799            |
| Low-dose ICS                                 | 37%               | 10,124        | £27,324                         | £276,621               | 8,602         | £44,795                         | £385,337            |
| Low-dose ICS+LABA                            | 15%               | 2,919         | £44,642                         | £130,294               | 4,713         | £69,691                         | £328,469            |
| Medium-dose ICS±additional therapies         | 20%               | 3,507         | £60,140                         | £210,889               | 6,407         | £106,402                        | £681,696            |
| High-dose ICS±additional therapies           | 8%                | 859           | £121,429                        | £104,356               | 2,894         | £208,457                        | £603,376            |
| <b>TOTAL</b>                                 |                   | <b>24,594</b> |                                 | <b>£914,320</b>        | <b>25,406</b> |                                 | <b>£2,125,677</b>   |
| <b>HCRU cost difference, high versus low</b> |                   |               |                                 | <b>£1,211,357/year</b> |               |                                 |                     |

\*Expressed as an average (i.e., sum of costs per 1,000 patients per year). Percentages may not sum to 100% due to rounding.



BTS, British Thoracic Society; CPRD, Clinical Practice Research Datalink; HCRU, healthcare resource utilisation; ICS, inhaled corticosteroid; LABA, long-acting  $\beta_2$ -agonist; PCN, primary care network; SABA, short-acting  $\beta_2$ -agonist.

**Supplementary Figure 1: HCRU cost drivers by SABA inhaler use and BTS treatment steps**

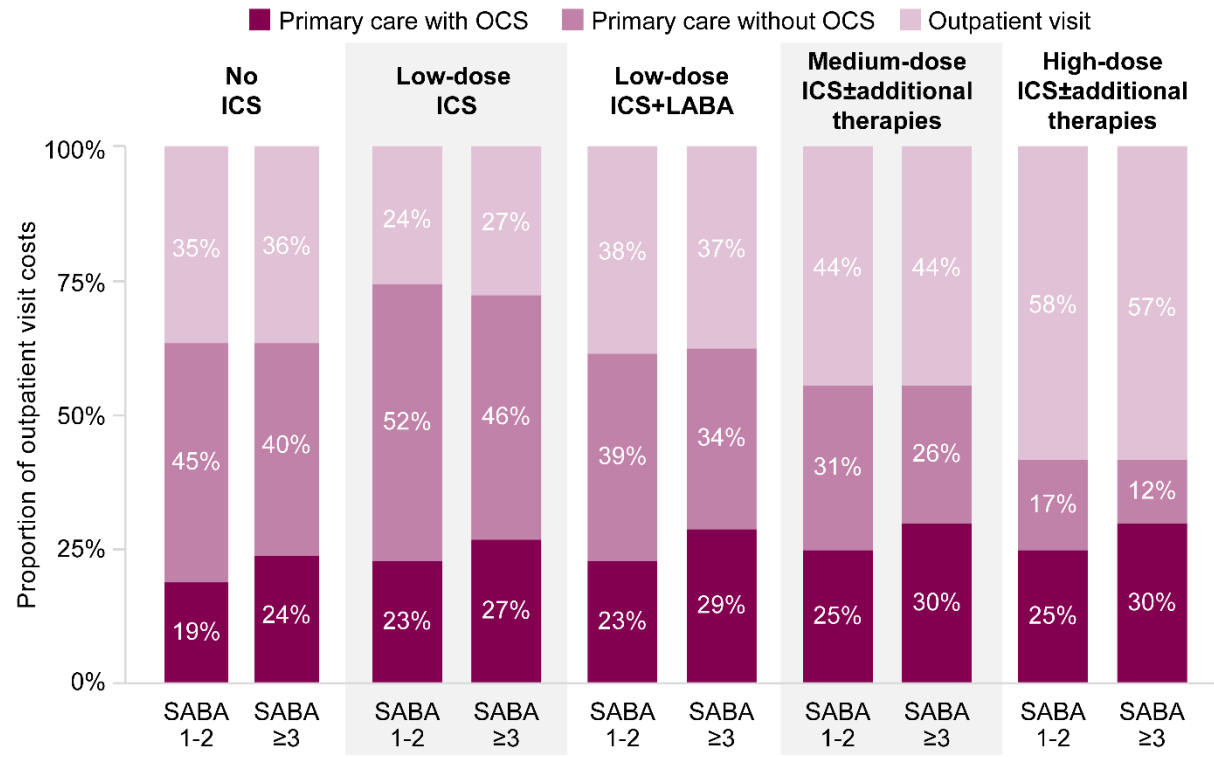

Percentages may not sum to 100% due to rounding.

BTS, British Thoracic Society; HCRU, healthcare resource utilisation; ICS, inhaled corticosteroid; LABA, long-acting  $\beta_2$ -agonist; OCS, oral corticosteroid; SABA, short-acting  $\beta_2$ -agonist.

**Supplementary Figure 2:** Medication costs in UK patients with asthma by BTS treatment steps (A) Per 1,000 patients\* (B) Cost differential: high-SABA versus low-SABA group (absolute and percentage differences)

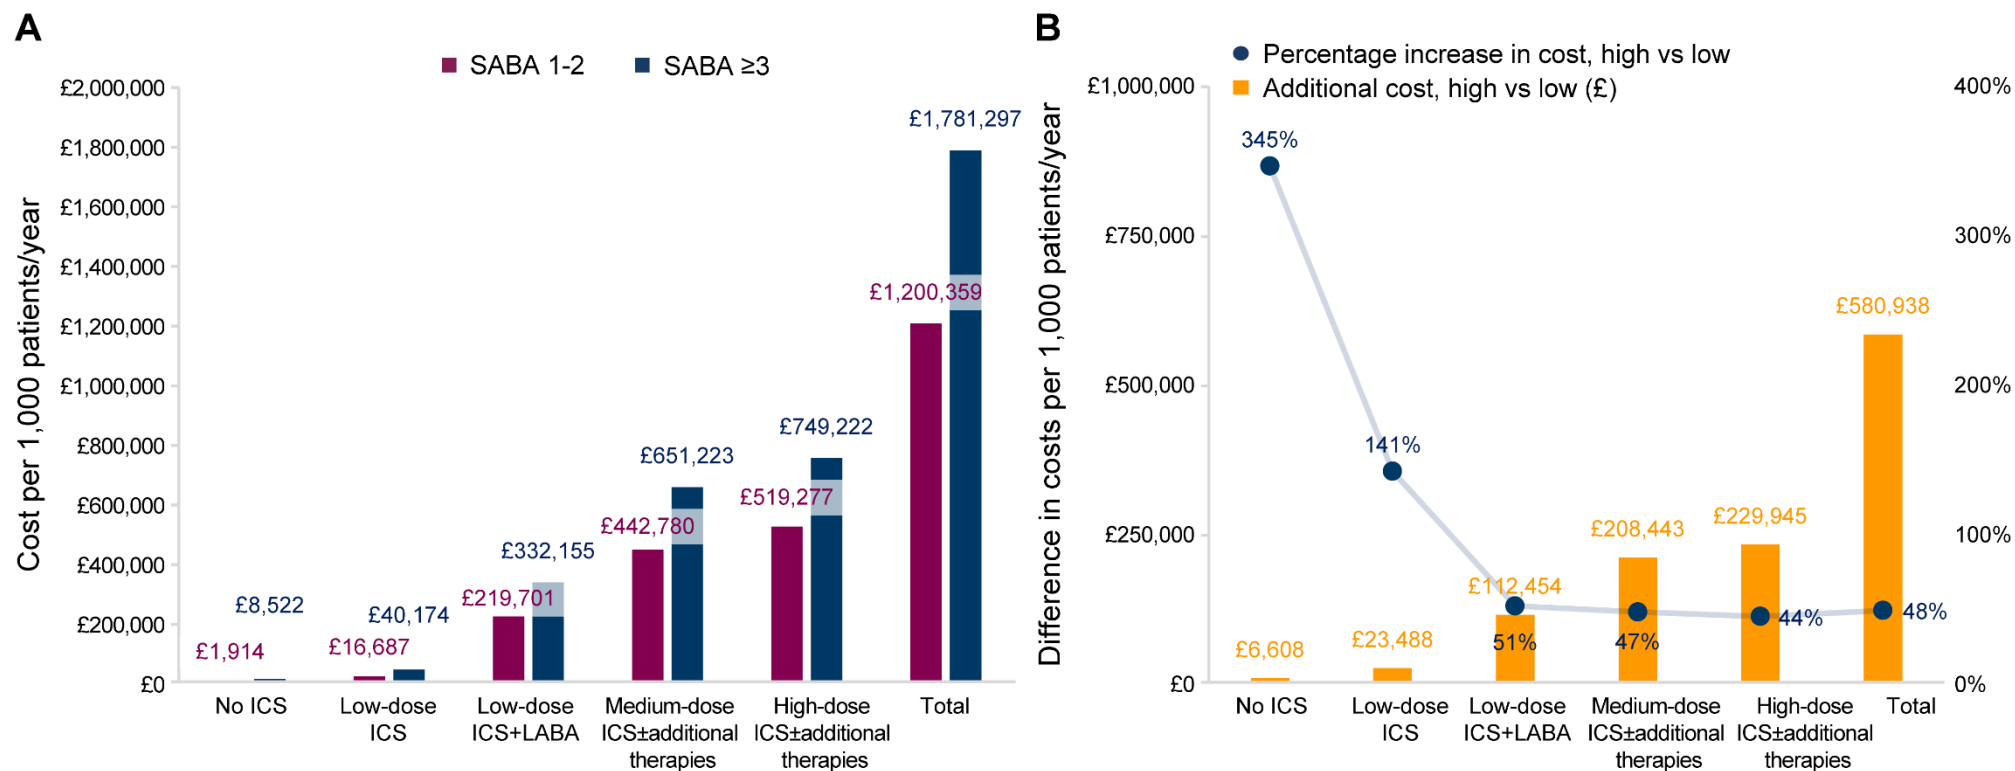

\*Expressed as an average (i.e., sum of costs per 1,000 patients per year). Estimates are subject to rounding  
 BTS, British Thoracic Society; ICS, inhaled corticosteroid; LABA, long-acting  $\beta_2$ -agonist; SABA, short-acting  $\beta_2$ -agonist; UK, United Kingdom.

**Supplementary Figure 3:** Cost of maintenance and reliever medications in UK patients with asthma by SABA inhaler use and BTS treatment steps

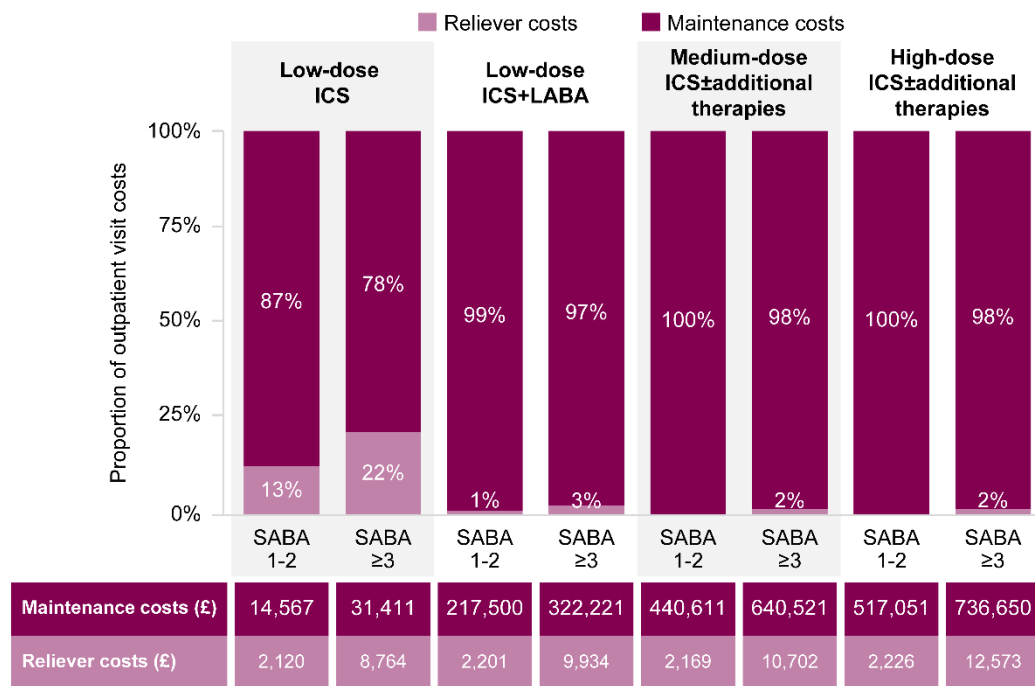

Estimates are subject to rounding.

BTS, British Thoracic Society; ICS, inhaled corticosteroid; LABA, long-acting  $\beta_2$ -agonist; SABA, short-acting  $\beta_2$ -agonist; UK, United Kingdom.

**Supplementary Figure 4:** HCRU costs per 1,000 UK patients\* with asthma by BTS treatment steps in (A) Full analysis cohort (B) Subgroup with  $\geq 50\%$  PDC

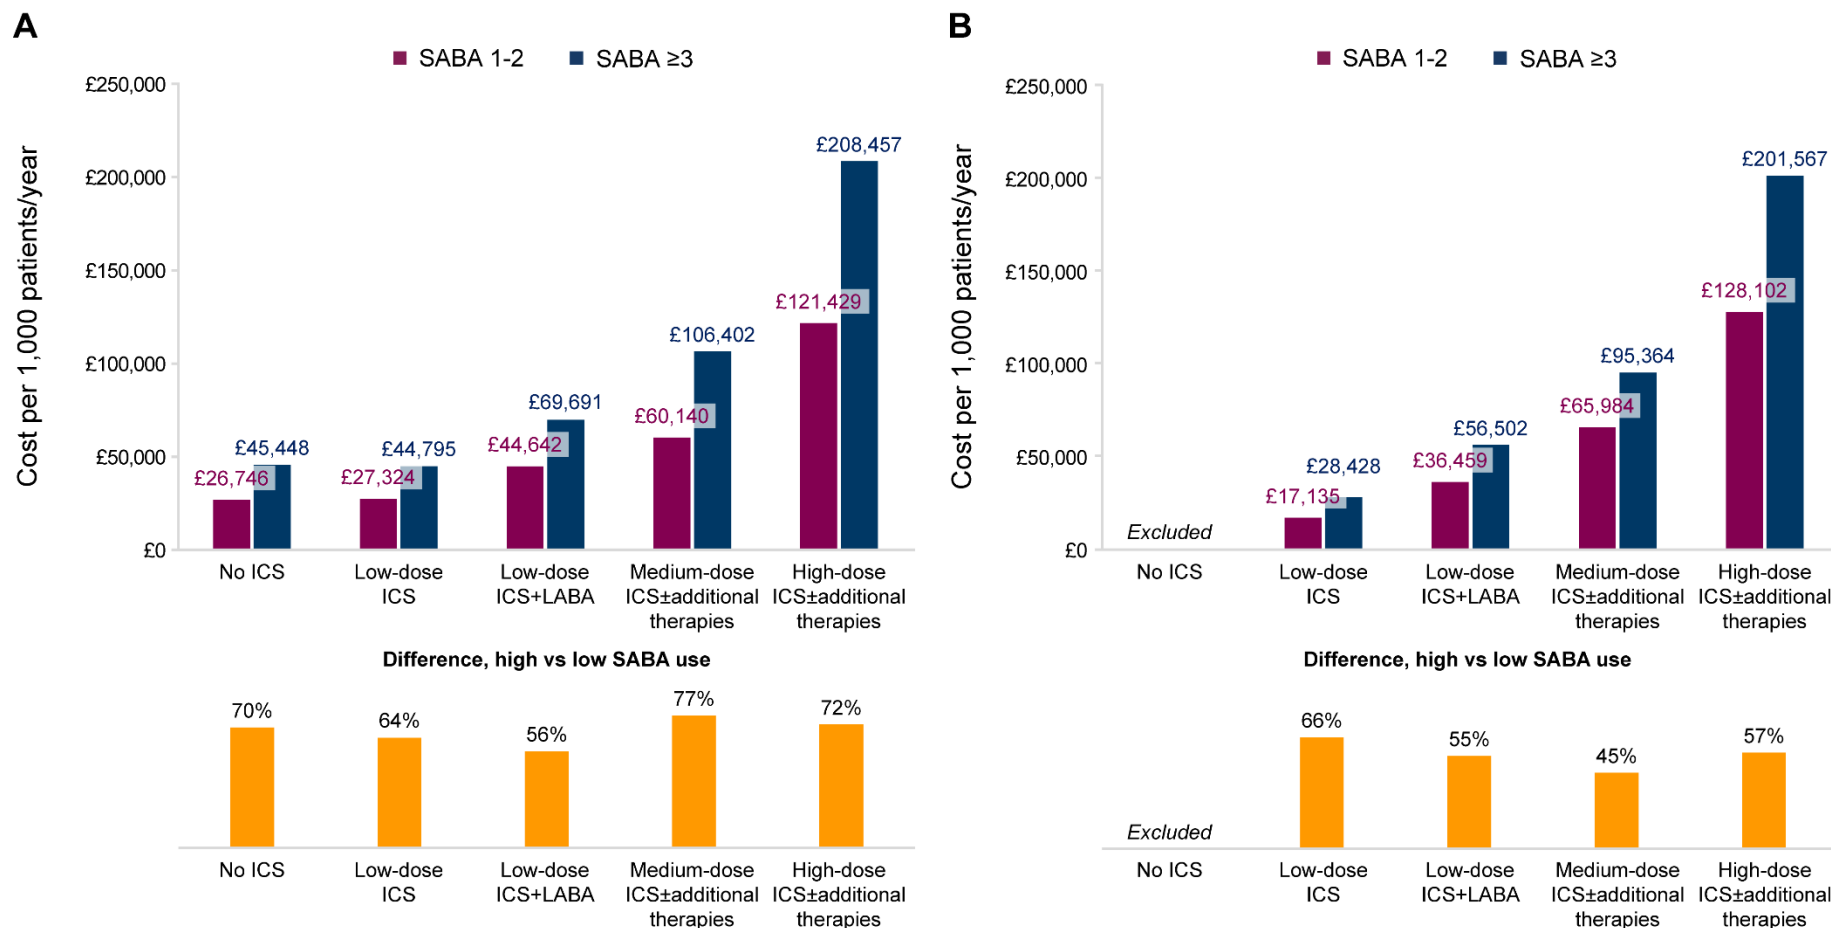

\*Expressed as an average (i.e., sum of costs per 1,000 patients per year).

BTS, British Thoracic Society; ICS, inhaled corticosteroid; LABA, long-acting  $\beta_2$ -agonist; PDC, proportion of days covered; SABA, short-acting  $\beta_2$ -agonist.
